# Supplementary material for: Nonhistone Proteins HMGB1 and HMGB2 Differentially Modulate the Response of Human Embryonic Stem Cells and the Progenitor Cells to the Anticancer Drug Etoposide
Source: MDPI journal article supplement (doi:10.3390/biom10101450), 2020-10-15
Supplement: s1 [file s1]

**A**

hESCs

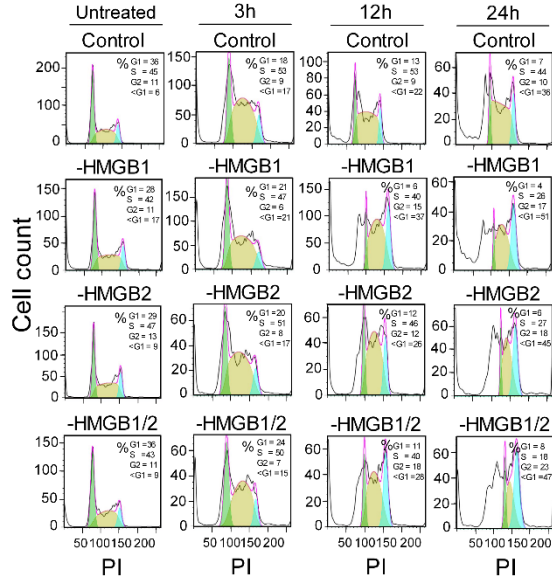**B**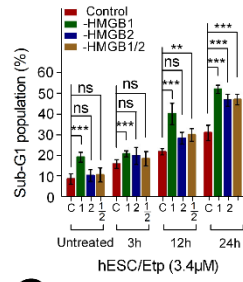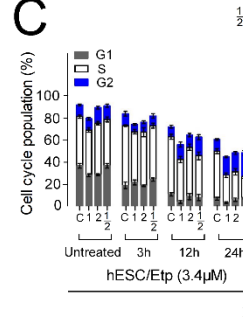**D**

hNECs/Scenario A

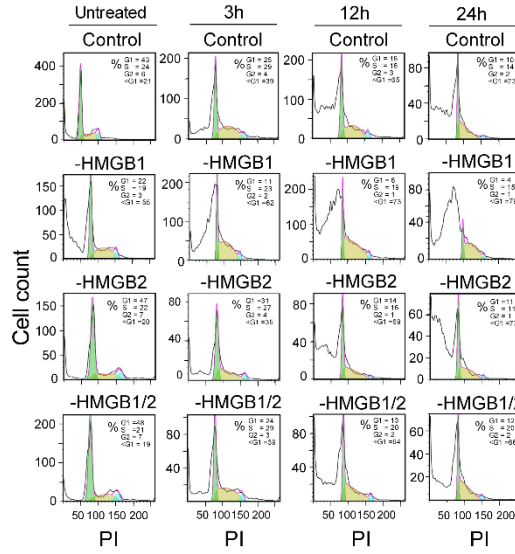**E**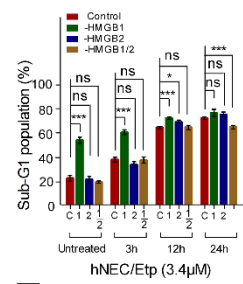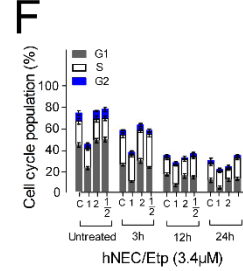**G**

hNECs/Scenario B

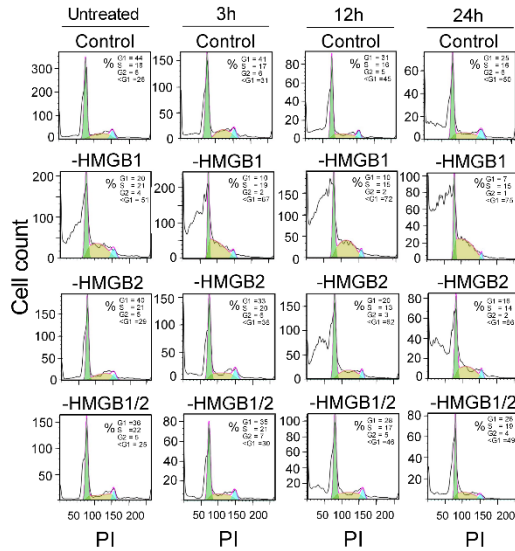**H**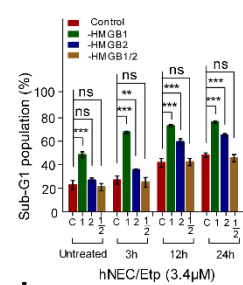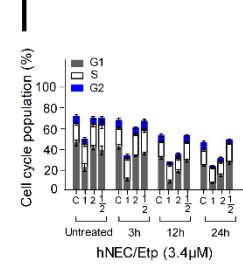

**Figure 1.** Etoposide-treated hESCs and hNECs exhibit time- and *HMGBs* KD-dependent cell-cycle progression and sub-G1 peak formation. *Panels A, D and G:* Cell cycle profile analysis. Control (empty vector-transfected) cells and cells with lack of *HMGB* proteins, either untreated or treated with Etop (3.4  $\mu$ M) for 3-24 h, stained with PI and analyzed by flow cytometry to determine cell cycle distribution of hESCs (*panel A*) and hNECs prepared by either *scenario A* (*panel D*) or *scenario B* (*panel G*). *Panels B, E and H:* Percentage of sub-G1 fraction in hESCs and hNECs prepared by either *scenario A* or *scenario B* and evaluated by flow cytometry. Representative histograms of percentage of cells in each phase of the cell cycle shown in *panels A, D and G*. Error bars represent SD of three independent experiments. Intensity of propidium iodide stained nuclei, PI; data were analyzed by Bonferroni posttest ( $P > 0.05$  not significant, ns;  $P < 0.05$  \*,  $P < 0.01$  \*\*,  $P < 0.001$  \*\*\*). “C”, cells transfected with empty vector; “-HMGB1”, cells upon *HMGB1* knockdown; “-HMGB2”, cells upon *HMGB2* knockdown; “-HMGB1/2”, cells upon *HMGB1* and *HMGB2* knockdown. “1”, cells upon *HMGB1* knockdown; “2”, cells upon *HMGB2* knockdown; “1/2”, cells upon *HMGB1* and *HMGB2* knockdown.
